# Supplementary material for: Effect of Resveratrol on Reactive Oxygen Species-Induced Cognitive Impairment in Rats with Angiotensin II-Induced Early Alzheimer&rsquo;s Disease
Source: Preprints.org preprint supplement (doi:10.20944/preprints201808.0371.v1), 2018-08-21
Supplement: Supplementary file 1 [file supplementary]

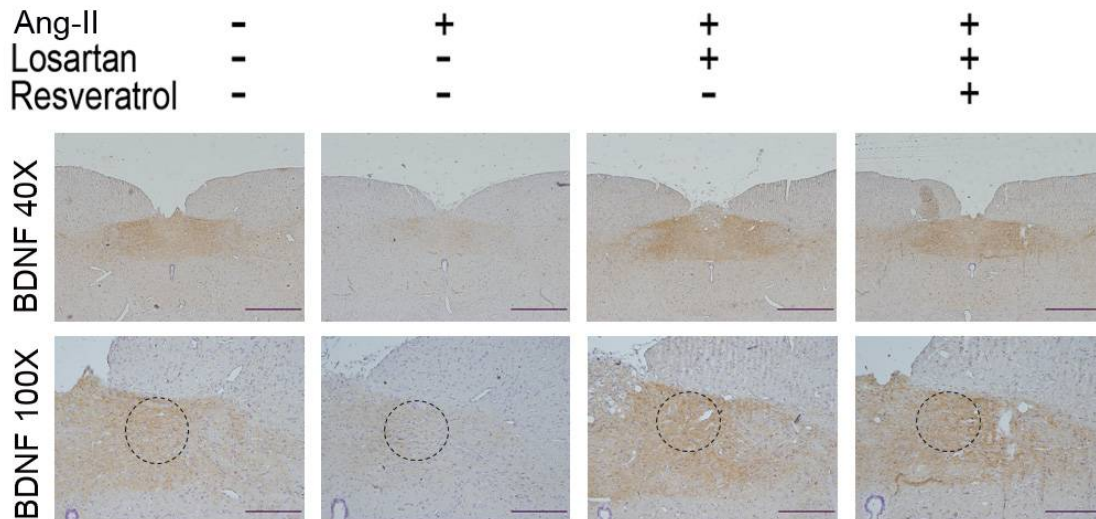

| Staining Intensity                                               | Sham   | Ang-II | Ang-II + Losartan | Ang-II + Resveratrol |
|------------------------------------------------------------------|--------|--------|-------------------|----------------------|
| Strong                                                           | 3      | 0      | 3                 | 3                    |
| Weak                                                             | 0      | 3      | 0                 | 0                    |
| P-value of significant difference between AngII and other groups | 0.0182 |        |                   |                      |

**Supplement Fig. 1. BDNF levels were decreased in rats with Ang-II-induced early Alzheimer's disease (AD).**

*In situ* qualitative analysis of BDNF-immunopositive cells in the nucleus tractus solitarius (NTS) of AD model rats. Scale bar, 200 mm. BDNF-expressing cells after treatment with Ang-II and/or losartan or resveratrol. Note the significant increase in Ang-II-induced BDNF production after the administration of losartan or resveratrol.

BDNF: brain-derived neurotrophic factor.
